# Supplementary material
Source: publisher figshare collection journal article supplement (https://karger.figshare.com/articles/dataset/_/22292473)

Raw DataS1  
Network pharmacology

| NO | CHEMBL ID     | Compound CID | 结构式                                                                                 | 化合物                      | 中文名             | 分子式                                             | 分子量    |
|----|---------------|--------------|-------------------------------------------------------------------------------------|--------------------------|-----------------|-------------------------------------------------|--------|
| 1  | CHEMBL 297453 | 65064        | 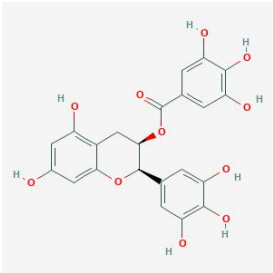   | Epigallocatechin Gallate | 没食子儿茶素          | C <sub>22</sub> H <sub>18</sub> O <sub>11</sub> | 458.38 |
| 2  | CHEMBL 483083 | 5276454      |   | Catechin gallate         | 儿茶素没食子酸酯        | C <sub>22</sub> H <sub>18</sub> O <sub>10</sub> | 442.38 |
| 3  | CHEMBL 36327  | 107905       |  | Epicatechin Gallate      | 表儿茶素没食子酸酯       | C <sub>22</sub> H <sub>18</sub> O <sub>10</sub> | 442.38 |
| 4  | CHEMBL 507268 | 44586972     |  | Afzelin 3'-O-Gallate     | 阿夫泽林 3'-O-没食子酸酯 | C <sub>28</sub> H <sub>24</sub> O <sub>14</sub> | 584.49 |
| 5  | CHEMBL 445952 | 44586971     |  | Afzelin 2'-O-Gallate     | 阿夫泽林 2'-O-没食子酸酯 | C <sub>28</sub> H <sub>24</sub> O <sub>14</sub> | 584.49 |

|    |                   |          |                                                                                     |                                      |                       |                                                       |        |
|----|-------------------|----------|-------------------------------------------------------------------------------------|--------------------------------------|-----------------------|-------------------------------------------------------|--------|
| 6  | CHEMBL<br>1172735 | 15689618 | 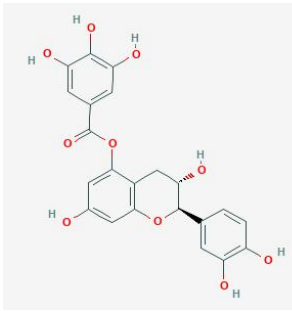   | Catechin<br>5-O-gallate              | 儿茶素 5-O-没食子酸酯         | C <sub>22</sub> H <sub>18</sub> O <sub>10</sub>       | 442.38 |
| 7  | CHEMBL<br>264938  | 199472   |    | Gallocatechin<br>gallate             | 没食子儿茶素没食子酸酯           | C <sub>22</sub> H <sub>18</sub> O <sub>11</sub>       | 458.38 |
| 8  | CHEMBL<br>159706  | 467295   |   | Epiafzelechin<br>3-O-Gallate         | 表阿福豆素<br>-3-O-没食子酸酯   | C <sub>22</sub> H <sub>18</sub> O <sub>9</sub>        | 426.38 |
| 9  | CHEMBL<br>229029  | 16747763 |  | dideoxy-epigallo<br>catechin gallate | 双脱氧-表没食子儿茶素没食子酸酯      | C <sub>22</sub> H <sub>18</sub> O <sub>9</sub>        | 426.38 |
| 10 | CHEMBL<br>2235643 | 76308049 |  | [3H](-)-Epigallo<br>atecgin gallate  | [3H] (-) 表没食子儿茶素没食子酸酯 | C <sub>22</sub> H <sub>17</sub> IO <sub>11</sub><br>1 | 592.30 |

|    |                   |          |                                                                                     |                                                                                                                         |                                                                                     |                                                      |        |
|----|-------------------|----------|-------------------------------------------------------------------------------------|-------------------------------------------------------------------------------------------------------------------------|-------------------------------------------------------------------------------------|------------------------------------------------------|--------|
| 11 | CHEMBL<br>2235644 | 76308050 | 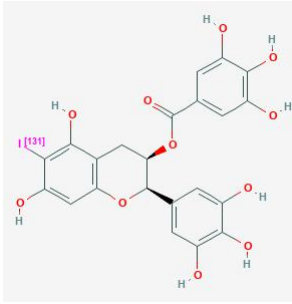   | [131I]-Epigallo-<br>catechin gallate                                                                                    | [131I]-儿茶素没<br>食子酸                                                                  | C <sub>22</sub> H <sub>17</sub> O <sub>11</sub><br>1 | 588.27 |
| 12 | CHEMBL<br>129451  | 6419835  |    | catechin gallate                                                                                                        | 儿茶素没食子酸<br>酯                                                                        | C <sub>22</sub> H <sub>18</sub> O <sub>10</sub>      | 442.38 |
| 13 | CHEMBL<br>3236511 | 10031482 |   | 2'-O-galloylquercetin                                                                                                   | 2'-O-没食子酰<br>槲皮苷                                                                    | C <sub>28</sub> H <sub>24</sub> O <sub>15</sub>      | 600.49 |
| 14 | CHEMBL<br>444191  | 5488619  |  | Astragaloside<br>2''-gallate                                                                                            | 黄芪甲苷 2''-没<br>食子酸酯                                                                  | C <sub>28</sub> H <sub>24</sub> O <sub>15</sub>      | 600.49 |
| 15 | CHEMBL<br>4471702 | 26194291 |  | [(2S,3R)-2-(3,4-<br>dihydroxyphenyl)-3,5-dihydroxy<br>-3,4-dihydro-2H<br>-chromen-7-yl]<br>3,4,5-trihydroxy<br>benzoate | [(2S, 3R) -2-<br>(3,4-二羟基苯<br>基) -3,5-二羟基<br>-3,4-二氢-2H-铬<br>-7-基]3,4,5-三羟<br>基苯甲酸酯 | C <sub>22</sub> H <sub>18</sub> O <sub>10</sub>      | 442.38 |

|    |                   |           |                                                                                     |                                                                                                                                                        |                                                                                                   |                                                 |        |
|----|-------------------|-----------|-------------------------------------------------------------------------------------|--------------------------------------------------------------------------------------------------------------------------------------------------------|---------------------------------------------------------------------------------------------------|-------------------------------------------------|--------|
| 16 | CHEMBL<br>4472624 | 26087900  | 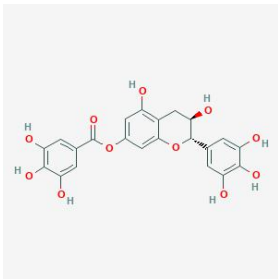   | [(2S,3R)-3,5-Dihydroxy-2-(3,4,5-trihydroxyphenyl)-3,4-dihydro-2H-chromen-7-yl]<br>3,4,5-trihydroxybenzoate                                             | [(2S, 3R) -3,5-二羟基-2-(3,4,5-三羟基苯基)-3,4-二氢-2H-铬-7-基]3,4,5-三羟基苯甲酸酯                                  | C <sub>22</sub> H <sub>18</sub> O <sub>11</sub> | 458.38 |
| 17 | CHEMBL<br>4088244 | 89280670  |    | 3,4,5-Trihydroxybenzoic acid<br>(2R)-2alpha-(3,4,5-trihydroxyphenyl)-5-hydroxy-7-methoxychroman-3alpha-yl ester                                        | 3,4,5-三羟基苯甲酸 (2R)<br>-2alpha- (3,4,5-三羟基苯基) -5-羟基-7-甲氧基苯并吡喃-3- α -基酯                              | C <sub>23</sub> H <sub>20</sub> O <sub>11</sub> | 472.40 |
| 18 | CHEMBL<br>338988  | 2824823   |   | [(2S,3S)-5,7-dihydroxy-2-(3,4,5-trihydroxyphenyl)-3,4-dihydro-2H-chromen-3-yl]<br>3,4,5-trihydroxybenzoate                                             | [(2S, 3S) -5,7-二羟基-2-(3,4,5-三羟基苯基)-3,4-二氢-2H-铬-3-基] 3,4,5-三羟基苯甲酸酯                                 | C <sub>22</sub> H <sub>18</sub> O <sub>11</sub> | 458.38 |
| 19 | CHEMBL<br>3934873 | 102287521 |  | 3-(3-O-Galloyl-beta-D-glucopyranosyloxy)-5,7,3',4'-tetrahydroxyflavone                                                                                 | 3- (3-O-没食子酸基- β -D-吡喃葡萄糖基氧基) -5,7,3',4'-四羟基丙酮                                                    | C <sub>28</sub> H <sub>24</sub> O <sub>16</sub> | 616.48 |
| 20 | CHEMBL<br>3942991 | 134145562 |  | [(2R,3S,4R,5R,6S)-6-[2-(3,4-Dihydroxyphenyl)-5,7-dihydroxy-4-oxochromen-3-yl]oxy-4,5-dihydroxy-2-(hydroxymethyl)oxan-3-yl]<br>3,4,5-trihydroxybenzoate | [(2R, 3S, 4R, 5R, 6S) -6-[2-(3,4-二羟基苯基) -5,7-二羟基-4-氧代铬-3-基]氧基-4,5-二羟基-2-(羟甲基)氧基-3-基]3,4,5-三羟基苯甲酸酯 | C <sub>28</sub> H <sub>24</sub> O <sub>16</sub> | 616.48 |

|    |                   |           |                                                                                     |                                                                                                            |                                                                  |                                                 |        |
|----|-------------------|-----------|-------------------------------------------------------------------------------------|------------------------------------------------------------------------------------------------------------|------------------------------------------------------------------|-------------------------------------------------|--------|
| 21 | MOL0058<br>65     | 471393    | 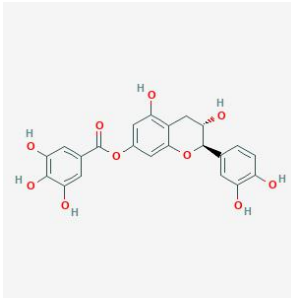   | Catechin<br>7-O-gallate                                                                                    | 儿茶素 7-O-没食子酸酯                                                    | C <sub>22</sub> H <sub>18</sub> O <sub>10</sub> | 442.38 |
| 22 | CHEMBL<br>2414344 | 11686333  |    | procyanidin B3<br>3'-O-gallate                                                                             | 原花青素 B3<br>3'-O-没食子酸酯                                            | C <sub>37</sub> H <sub>30</sub> O <sub>16</sub> | 730.63 |
| 23 | CHEMBL<br>4216177 | 44257117  |   | Gallocatechin<br>7,4'-di-O-gallate                                                                         | 没食子儿茶素<br>7,4'-di-O-没食子酸酯                                        | C <sub>29</sub> H <sub>22</sub> O <sub>15</sub> | 610.48 |
| 24 | CHEMBL<br>2414343 | 11331595  |  | Procyanidin B3<br>3-O-gallate                                                                              | 原花青素 B3<br>3-O-没食子酸酯                                             | C <sub>37</sub> H <sub>30</sub> O <sub>16</sub> | 730.63 |
| 25 | CHEMBL<br>4216621 | 145972597 |  | [(2R,3S)-3,5-Dihydroxy-2-(3,4,5-trihydroxyphenyl)-3,4-dihydro-2H-chromen-7-yl]<br>3,4,5-trihydroxybenzoate | [(2R, 3S) -3,5-二羟基-2-(3,4,5-三羟基苯基)-3,4-二氢-2H-铬-7-基]3,4,5-三羟基苯甲酸酯 | C <sub>22</sub> H <sub>18</sub> O <sub>11</sub> | 458.38 |



|    |                   |          |                                                                                     |                                                                                                   |                                                   |                        |        |  |
|----|-------------------|----------|-------------------------------------------------------------------------------------|---------------------------------------------------------------------------------------------------|---------------------------------------------------|------------------------|--------|--|
|    |                   |          |                                                                                     | 4,5-trihydroxybenzoyl)oxy-3,4-dihydro-2H-chromen-4-yl]-5,7-dihydroxy-3,4-dihydro-2H-chromen-3-yl] | 基苯甲酰基) 氧基-34-二氢-2H-铬-4-基] -57-二羟基-34-二氢-2H-铬-3-基] | 345-三羟基苯甲酸酯            |        |  |
| 31 | CHEMBL<br>1093050 | 23583011 | 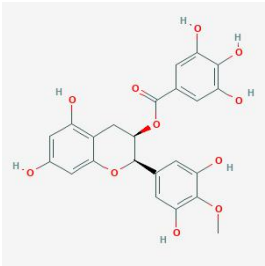   | 4'-O-methylepigallocatechin-3-O-gallate                                                           | 4'-O-甲基表没食子儿茶素-3-O-没食子酸酯                          | <chem>C23H20O11</chem> | 472.40 |  |
| 32 | CHEMBL<br>499432  | 9830456  |   | Tellimoside                                                                                       | 泰利莫甙                                              | <chem>C28H24O16</chem> | 616.48 |  |
| 33 | CHEMBL<br>39504   | 124016   |  | Procyanidin B2<br>3,3'-Di-O-Gallate                                                               | 原花青素 B2<br>3,3'-二-O-没食子酸酯                         | <chem>C44H34O20</chem> | 882.74 |  |
| 34 | CHEMBL<br>459260  | 5480249  |  | Quercetin<br>3-glucoside                                                                          | 槲皮素 3-葡萄糖苷                                        | <chem>C28H24O16</chem> | 616.48 |  |

|    |                   |          |                                                                                     |                                                 |                                  |                                                 |        |
|----|-------------------|----------|-------------------------------------------------------------------------------------|-------------------------------------------------|----------------------------------|-------------------------------------------------|--------|
| 35 | CHEMBL<br>311663  | 1287     | 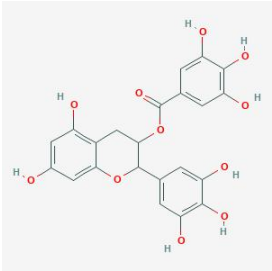   | Gallocatechin<br>gallate                        | 没食子儿茶素没<br>食子酸酯                  | C <sub>22</sub> H <sub>18</sub> O <sub>11</sub> | 458.38 |
| 36 | CHEMBL<br>422711  | 467306   |    | Rhodisin                                        | 罗地辛                              | C <sub>44</sub> H <sub>34</sub> O <sub>22</sub> | 914.73 |
| 37 | CHEMBL<br>562716  | 9804842  |   | Epigallocatechin<br>3-O-(3-O-methy<br>l)gallate | 表没食子儿茶素<br>3-O-(3-O-甲基)<br>没食子酸酯 | C <sub>23</sub> H <sub>20</sub> O <sub>11</sub> | 472.40 |
| 38 | CHEMBL<br>158521  | 467296   |  | Epicatechin<br>3-O-(3-O-methy<br>lgallate)      | 表儿茶素 3-O-<br>(3-O-甲基没食<br>子酸酯)   | C <sub>23</sub> H <sub>20</sub> O <sub>10</sub> | 456.40 |
| 39 | CHEMBL<br>559294  | 401129   |  | 4''-Methylepigall<br>ocatechin gallate          | 4''-甲基表没食<br>子儿茶素没食子<br>酸酯       | C <sub>23</sub> H <sub>20</sub> O <sub>11</sub> | 472.40 |
| 40 | CHEMBL<br>1935379 | 54755091 |  | 3-O-Galloylquer<br>cetin                        | 3-O-没食子酰槲<br>皮素                  | C <sub>22</sub> H <sub>14</sub> O <sub>11</sub> | 454.34 |

## Raw Data S2

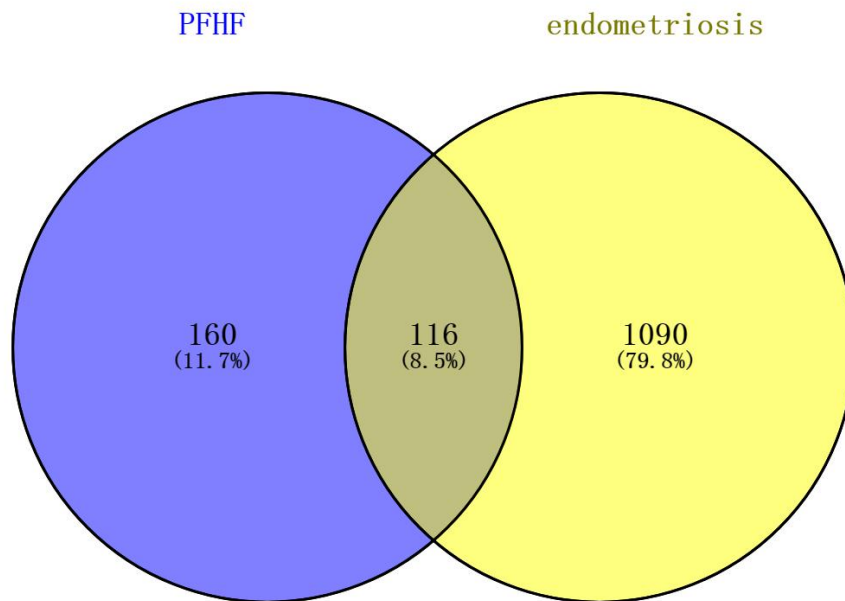

### intersection targets

number of nodes: 116

number of edges: 1812

average node degree: 31.2

avg. local clustering coefficient: 0.67

expected number of edges: 564

PPI enrichment p-value:  $< 1.0e-16$



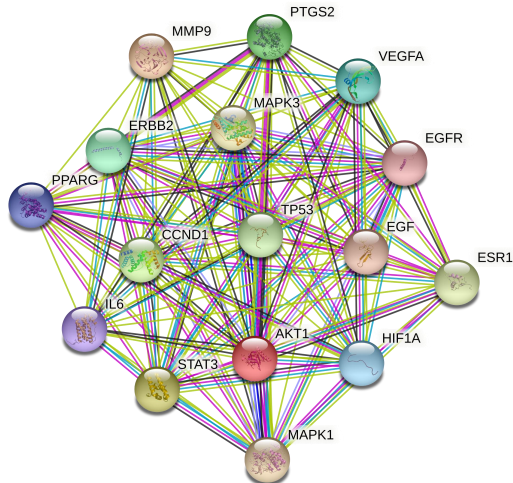

|       |        |    |                                            |
|-------|--------|----|--------------------------------------------|
| AKT1  | Degree | 91 | Betweenness 886.95734 Closeness 0.81560284 |
| TP53  | Degree | 87 | Betweenness 810.54663 Closeness 0.7986111  |
| VEGFA | Degree | 79 | Betweenness 403.48343 Closeness 0.7565789  |
| ESR1  | Degree | 77 | Betweenness 1123.4476 Closeness 0.751634   |
| STAT3 | Degree | 77 | Betweenness 328.17703 Closeness 0.7419355  |
| EGFR  | Degree | 76 | Betweenness 387.93515 Closeness 0.73717946 |
| MAPK3 | Degree | 76 | Betweenness 413.74265 Closeness 0.7419355  |
| IL6   | Degree | 73 | Betweenness 428.62036 Closeness 0.7278481  |
| HIF1A | Degree | 72 | Betweenness 299.1978 Closeness 0.7232704   |
| EGF   | Degree | 70 | Betweenness 219.8099 Closeness 0.70987654  |
| CCND1 | Degree | 70 | Betweenness 318.2578 Closeness 0.70987654  |
| MMP9  | Degree | 65 | Betweenness 480.6608 Closeness 0.6886228   |
| PTGS2 | Degree | 60 | Betweenness 292.85876 Closeness 0.6764706  |
| ERBB2 | Degree | 60 | Betweenness 184.1135 Closeness 0.6647399   |
| PPARG | Degree | 59 | Betweenness 301.5466 Closeness 0.6686047   |
| MAPK1 | Degree | 57 | Betweenness 201.06628 Closeness 0.6571429  |

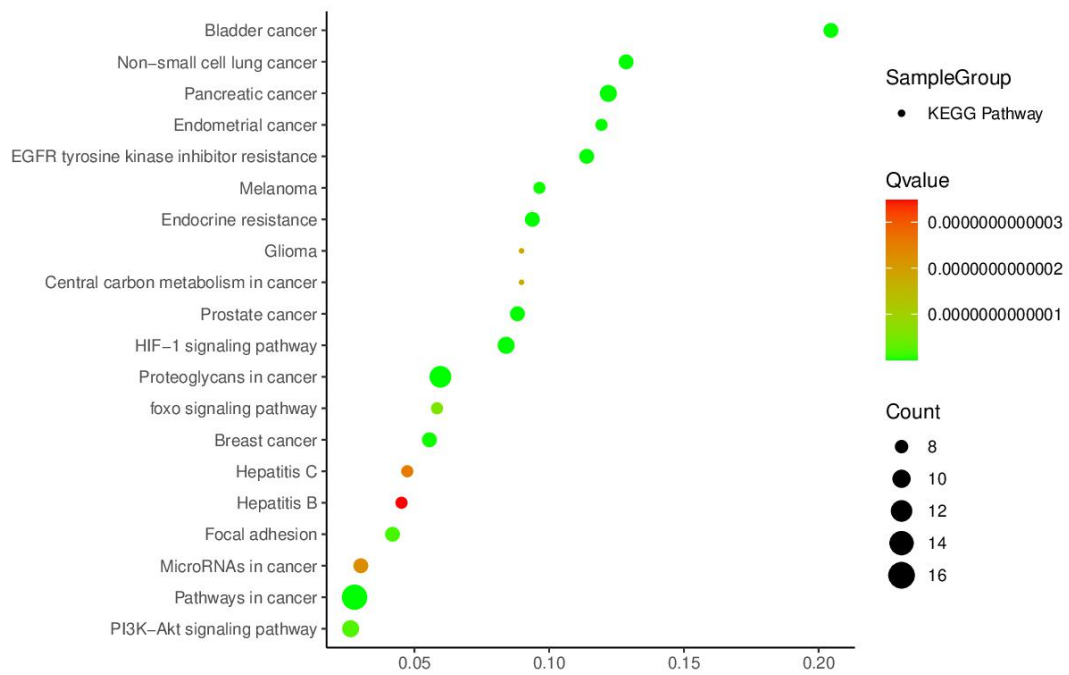

## Immunofluorescence

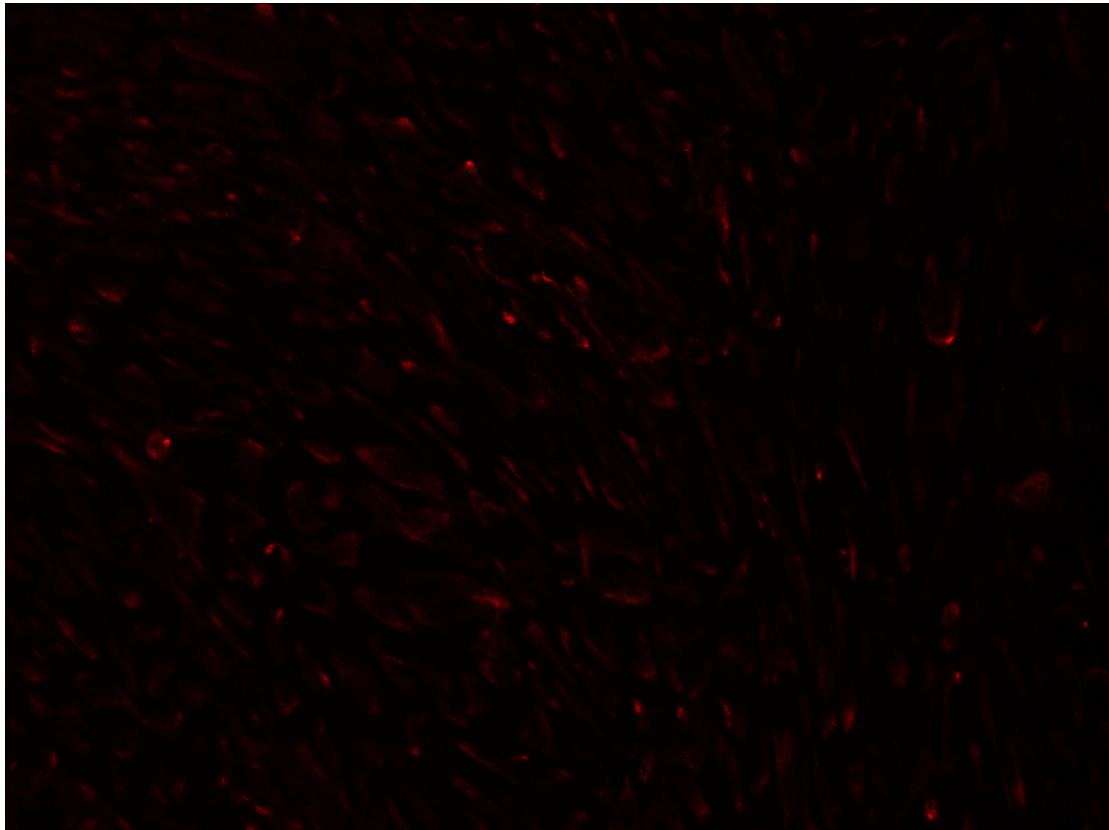

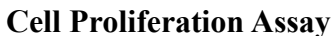

|                             |                                                                                              |             |             |             |             |             |             |             |             |             |
|-----------------------------|----------------------------------------------------------------------------------------------|-------------|-------------|-------------|-------------|-------------|-------------|-------------|-------------|-------------|
| User                        | DESKTOP-LLG19K\zdsys                                                                         |             |             |             |             |             |             |             |             |             |
| Plate                       | Greiner 96 Flat Bottom Transparent Polystyrene Cat. No.: 655101/655161/655192 [GRE96ft.pdfx] |             |             |             |             |             |             |             |             |             |
| Plate-ID (Stacker)          |                                                                                              |             |             |             |             |             |             |             |             |             |
| Label: Label1               |                                                                                              |             |             |             |             |             |             |             |             |             |
| Mode                        | Absorbance                                                                                   |             |             |             |             |             |             |             |             |             |
| Wavelength                  | 450 nm                                                                                       |             |             |             |             |             |             |             |             |             |
| Bandwidth                   | 9 nm                                                                                         |             |             |             |             |             |             |             |             |             |
| Number of Flashes           | 25                                                                                           |             |             |             |             |             |             |             |             |             |
| Settle Time                 | 0 ms                                                                                         |             |             |             |             |             |             |             |             |             |
| Part of Plate               | E2-E11                                                                                       |             |             |             |             |             |             |             |             |             |
| Start Time                  | 2021/1/29 14:03:05                                                                           |             |             |             |             |             |             |             |             |             |
| Temperature: 23.3 °C        |                                                                                              |             |             |             |             |             |             |             |             |             |
|                             | 2                                                                                            | 3           | 4           | 5           | 6           | 7           | 8           | 9           | 10          | 11          |
| B                           | 0.485399991                                                                                  | 0.455300003 | 0.430900007 | 0.400999993 | 0.2861      | 0.450199991 | 0.5097      | 0.397000015 | 0.356900007 | 0.2236      |
| C                           | 0.540499985                                                                                  | 0.522700012 | 0.461299986 | 0.421799988 | 0.277200013 | 0.589999974 | 0.561100006 | 0.465600014 | 0.312099993 | 0.197099999 |
| D                           | 0.515699983                                                                                  | 0.501800001 | 0.40990001  | 0.393999994 | 0.329899997 | 0.525200009 | 0.519900024 | 0.465600014 | 0.326700002 | 0.187600002 |
| E                           | 0.544000012                                                                                  | 0.600700003 | 0.603299987 | 0.357899994 | 0.307300001 | 0.538500011 | 0.474700004 | 0.454600006 | 0.272899985 | 0.184599996 |
| End Time:2021/1/29 14:03:40 |                                                                                              |             |             |             |             |             |             |             |             |             |

Flow cytometry

cell apoptosis

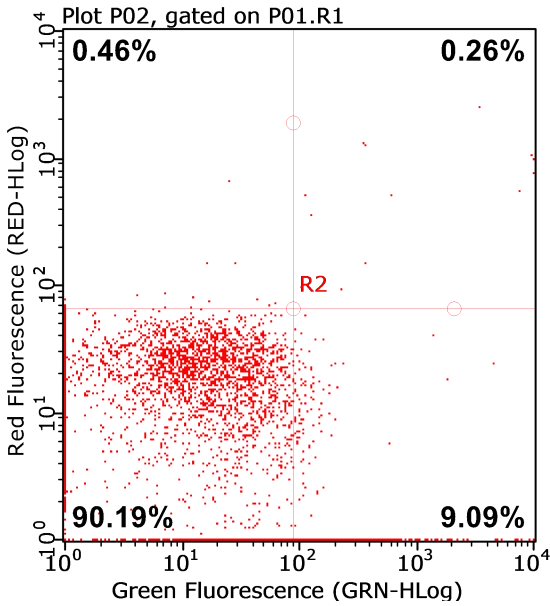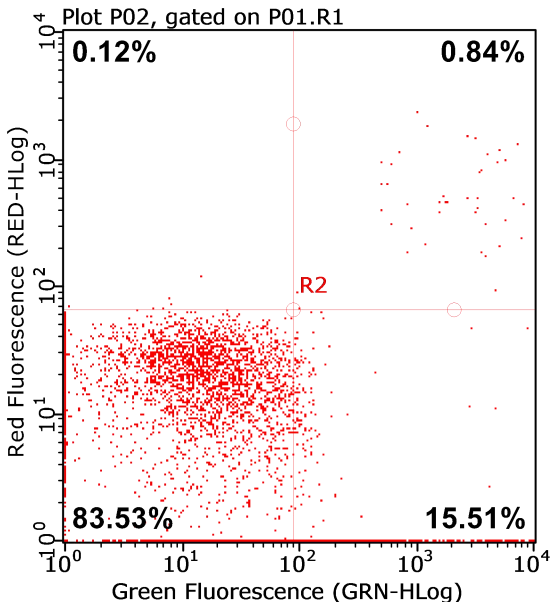

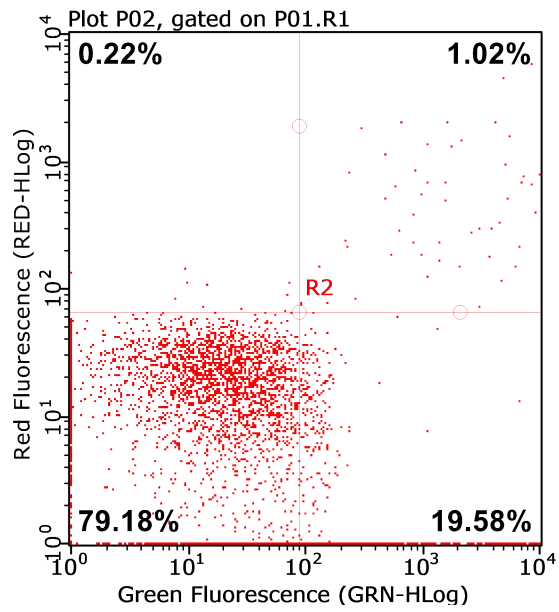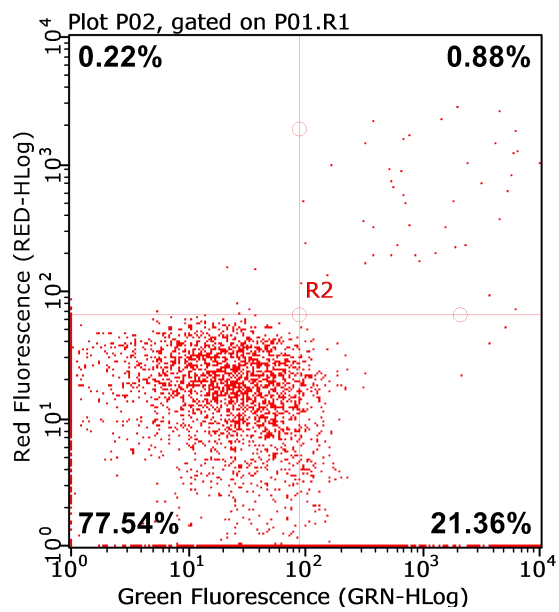

cell cycle

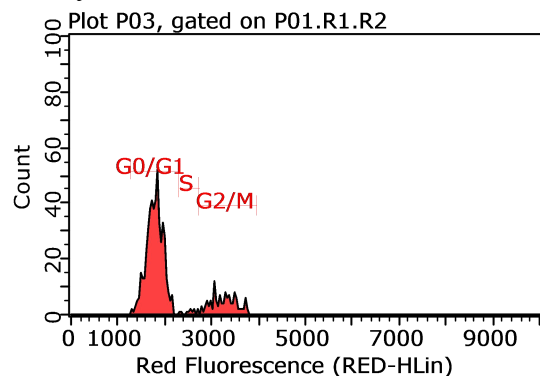

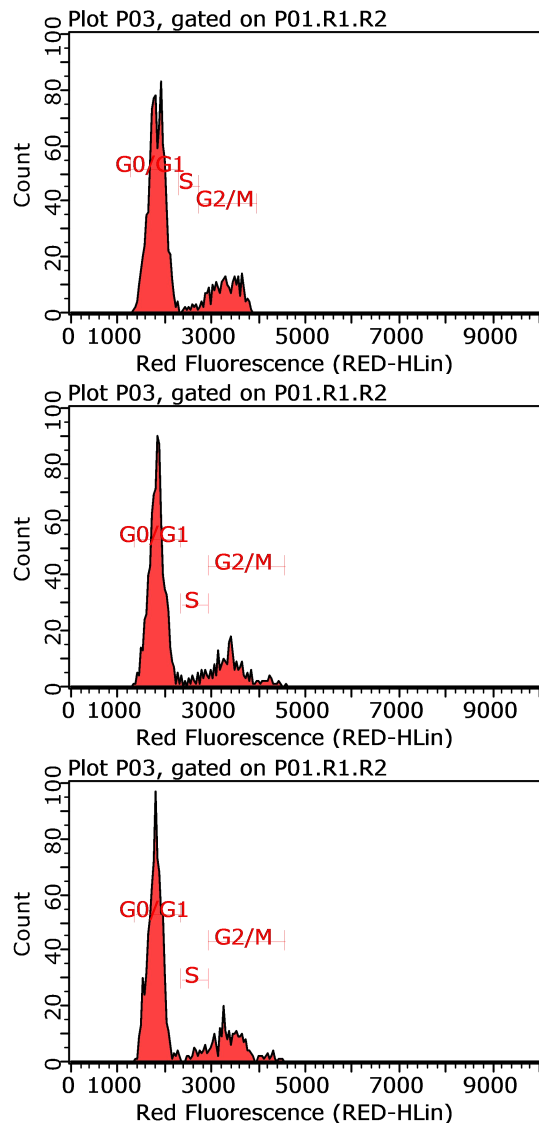

## Proteomics

| Checked | Protein FDI Master | Accession             | Description  | Exp. q-value | Contaminant | Sum PEP | Sc Coverage | # Peptides | # PSMs | # Unique P | # AAs | MW [kDa] | calc. pI | Score | Sequ | # Peptides |
|---------|--------------------|-----------------------|--------------|--------------|-------------|---------|-------------|------------|--------|------------|-------|----------|----------|-------|------|------------|
| TRUE    | High               | Master ProI H0YNC7    | Tropomyos    | 0            | FALSE       | 109.134 | 43          | 13         | 61     | 1          | 223   | 25.6     | 4.64     | 88.49 | 13   | 13         |
| TRUE    | High               | Master ProI P04264    | Keratin, typ | 0            | FALSE       | 48.567  | 22          | 10         | 34     | 10         | 644   | 66       | 8.12     | 53.17 | 10   | 10         |
| TRUE    | High               | Master ProI Q5JP53    | Tubulin bet  | 0            | FALSE       | 39.857  | 14          | 6          | 20     | 1          | 426   | 47.7     | 4.81     | 40.51 | 6    | 6          |
| TRUE    | High               | Master ProI P55072    | Transitiona  | 0            | FALSE       | 37.186  | 6           | 4          | 6      | 4          | 806   | 89.3     | 5.26     | 20.47 | 4    | 4          |
| TRUE    | High               | Master ProI A0A087WU  | Basigin OS-  | 0            | FALSE       | 35.524  | 25          | 3          | 6      | 3          | 189   | 20.5     | 6.68     | 20.47 | 3    | 3          |
| TRUE    | High               | Master ProI P35527    | Keratin, typ | 0            | FALSE       | 29.925  | 13          | 6          | 27     | 6          | 623   | 62       | 5.24     | 40.08 | 6    | 6          |
| TRUE    | High               | Master ProI P06576    | ATP synthase | 0            | FALSE       | 27.155  | 11          | 4          | 6      | 4          | 529   | 56.5     | 5.4      | 18.33 | 4    | 4          |
| TRUE    | High               | Master ProI P13640    | Metallothio  | 0            | FALSE       | 26.406  | 66          | 3          | 28     | 1          | 62    | 6.1      | 7.96     | 51.15 | 3    | 3          |
| TRUE    | High               | Master ProI Q562R1    | Beta-actin   | 0            | FALSE       | 23.877  | 14          | 5          | 40     | 1          | 376   | 42       | 5.59     | 67.29 | 5    | 5          |
| TRUE    | High               | Master ProI P08238    | Heat shock   | 0            | FALSE       | 20.273  | 6           | 3          | 4      | 2          | 724   | 83.2     | 5.03     | 11.07 | 3    | 3          |
| TRUE    | High               | Master ProI F5H0C8    | Gamma-en     | 0            | FALSE       | 19.906  | 10          | 2          | 6      | 1          | 315   | 34.7     | 4.87     | 14.8  | 2    | 2          |
| TRUE    | High               | Master ProI P15924    | Desmoplak    | 0            | FALSE       | 19.317  | 2           | 7          | 14     | 7          | 2871  | 331.6    | 6.81     | 9.08  | 7    | 7          |
| TRUE    | High               | Master ProI P14625    | Endoplasm    | 0            | FALSE       | 18.593  | 9           | 6          | 8      | 6          | 803   | 92.4     | 4.84     | 6.87  | 6    | 6          |
| TRUE    | High               | Master ProI P53621    | Coatomer s   | 0            | FALSE       | 17.241  | 3           | 4          | 10     | 4          | 1224  | 138.3    | 7.66     | 13.22 | 4    | 4          |
| TRUE    | High               | Master ProI P62241    | 40S ribosom  | 0            | FALSE       | 16.994  | 13          | 3          | 3      | 3          | 208   | 24.2     | 10.32    | 10.05 | 3    | 3          |
| TRUE    | High               | Master ProI A0A180GU5 | Uncharacte   | 0            | FALSE       | 15.988  | 7           | 2          | 4      | 2          | 557   | 59.8     | 6.62     | 12.65 | 2    | 2          |
| TRUE    | High               | Master ProI P05204    | Non-histon   | 0            | FALSE       | 15.855  | 34          | 2          | 3      | 2          | 90    | 9.4      | 9.99     | 7.58  | 2    | 2          |
| TRUE    | High               | Master ProI E9PCY7    | Heterogeni   | 0            | FALSE       | 15.737  | 9           | 2          | 2      | 1          | 429   | 47.1     | 6.34     | 8.15  | 2    | 2          |
| TRUE    | High               | Master ProI Q969H8    | Myeloid-de   | 0            | FALSE       | 15.227  | 18          | 3          | 5      | 3          | 173   | 18.8     | 6.68     | 12.46 | 3    | 3          |
| TRUE    | High               | Master ProI Q72406    | Myosin-14    | 0            | FALSE       | 15.179  | 1           | 3          | 5      | 1          | 1995  | 227.7    | 5.6      | 10.18 | 3    | 3          |

| checked | Protein FDI Master | Accession            | Description | Exp. q-value | Contaminant | Sum PEP | Sc Coverage | # Peptides | # PSMs | # Unique Pr | # AAs | MW [kDa] | calc. pI | Score Sequ | # Peptides | # R |
|---------|--------------------|----------------------|-------------|--------------|-------------|---------|-------------|------------|--------|-------------|-------|----------|----------|------------|------------|-----|
| FALSE   | High               | Master ProI P35579   | Myosin-9 O  | 0            | FALSE       | 386.531 | 25          | 50         | 182    | 47          | 1960  | 226.4    | 5.6      | 369.44     | 50         |     |
| FALSE   | High               | Master ProI Q5HY54   | Filamin-A C | 0            | FALSE       | 320.798 | 29          | 48         | 164    | 45          | 2607  | 276.4    | 6.05     | 337.23     | 48         |     |
| FALSE   | High               | Master ProI Q09666   | Neuroblast  | 0            | FALSE       | 238.75  | 19          | 50         | 116    | 50          | 5890  | 628.7    | 6.15     | 199.31     | 50         |     |
| FALSE   | High               | Master ProI Q15149   | Plectin OS- | 0            | FALSE       | 196.186 | 11          | 49         | 128    | 47          | 4684  | 531.5    | 5.96     | 236.69     | 49         |     |
| FALSE   | High               | Master ProI Q14315   | Filamin-C C | 0            | FALSE       | 184.738 | 17          | 34         | 104    | 30          | 2725  | 290.8    | 5.97     | 201.19     | 34         |     |
| FALSE   | High               | Master ProI Q5TCU3   | Tropomyos   | 0            | FALSE       | 147.002 | 48          | 19         | 76     | 1           | 284   | 32.8     | 4.68     | 138.67     | 19         |     |
| FALSE   | High               | Master ProI Q6ZN40   | Tropomyos   | 0            | FALSE       | 143.563 | 39          | 17         | 83     | 0           | 326   | 37.4     | 4.72     | 135.28     | 17         |     |
| FALSE   | High               | Master ProI H0YL52   | Tropomyos   | 0            | FALSE       | 137.069 | 46          | 18         | 74     | 3           | 265   | 30.5     | 4.69     | 124.95     | 18         |     |
| FALSE   | High               | Master ProI P60709   | Actin, cyto | 0            | FALSE       | 132.501 | 31          | 12         | 192    | 2           | 375   | 41.7     | 5.48     | 345.48     | 12         |     |
| FALSE   | High               | Master ProI P08670   | Vimentin C  | 0            | FALSE       | 130.716 | 41          | 21         | 117    | 19          | 466   | 53.6     | 5.12     | 193.33     | 21         |     |
| FALSE   | High               | Master ProI H7BY1    | Tropomyos   | 0            | FALSE       | 130.627 | 49          | 16         | 82     | 2           | 248   | 28.7     | 4.82     | 114.2      | 16         |     |
| FALSE   | High               | Master ProI P07355   | Annexin A2  | 0            | FALSE       | 114.689 | 38          | 14         | 66     | 14          | 339   | 38.6     | 7.75     | 131.39     | 14         |     |
| TRUE    | High               | Master ProI H0YNC7   | Tropomyos   | 0            | FALSE       | 109.134 | 43          | 13         | 61     | 1           | 223   | 25.6     | 4.64     | 88.49      | 13         |     |
| FALSE   | High               | Master ProI J3KN67   | Tropomyos   | 0            | FALSE       | 107.999 | 38          | 16         | 55     | 1           | 285   | 33.2     | 4.77     | 89.01      | 16         |     |
| FALSE   | High               | Master ProI A0A087WV | Tropomyos   | 0            | FALSE       | 107.816 | 48          | 16         | 55     | 1           | 227   | 26.4     | 4.78     | 88.55      | 16         |     |
| FALSE   | High               | Master ProI P67936   | Tropomyos   | 0            | FALSE       | 102.334 | 34          | 14         | 59     | 4           | 248   | 28.5     | 4.69     | 91.75      | 14         |     |
| FALSE   | High               | Master ProI P63267   | Actin, gamr | 0            | FALSE       | 94.793  | 23          | 10         | 156    | 1           | 376   | 41.9     | 5.48     | 265.1      | 10         |     |
| FALSE   | High               | Master ProI Q9P2E9   | Ribosome-l  | 0            | FALSE       | 90.342  | 32          | 23         | 60     | 23          | 1410  | 152.4    | 8.6      | 106.61     | 23         |     |
| FALSE   | High               | Master ProI P14618   | Pyruvate ki | 0            | FALSE       | 89.841  | 25          | 9          | 20     | 9           | 531   | 57.9     | 7.84     | 66.47      | 9          |     |
| FALSE   | High               | Master ProI O75369   | Filamin-B C | 0            | FALSE       | 87.546  | 9           | 18         | 41     | 14          | 2602  | 278      | 5.73     | 80.51      | 18         |     |

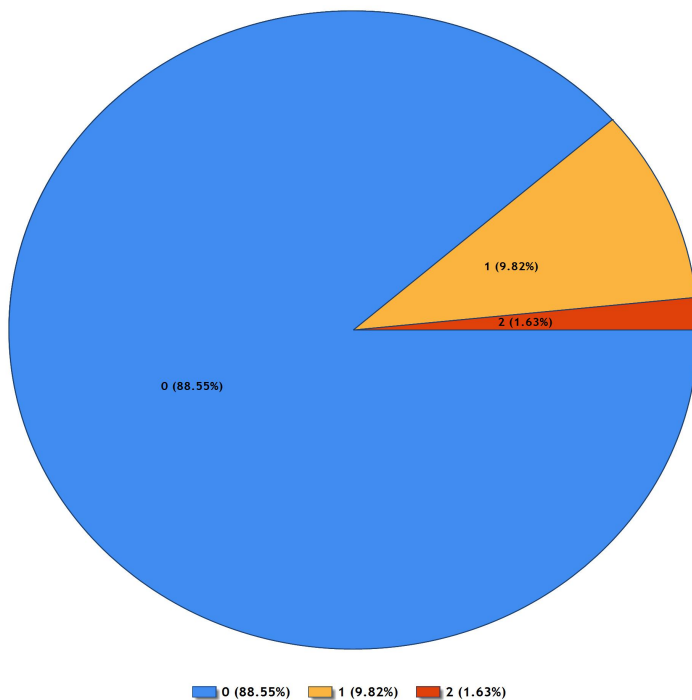

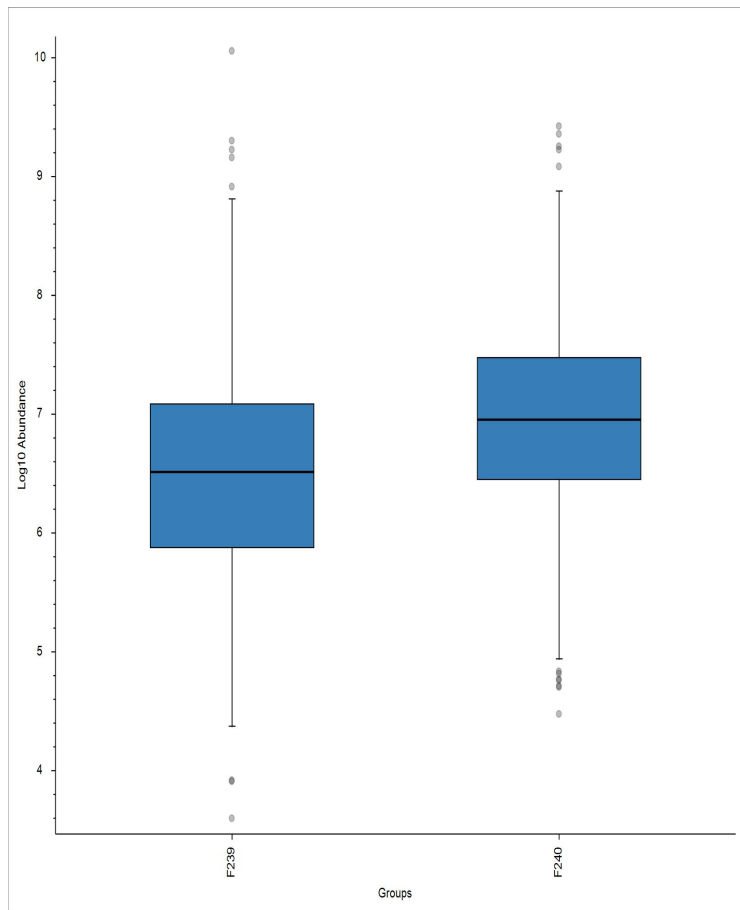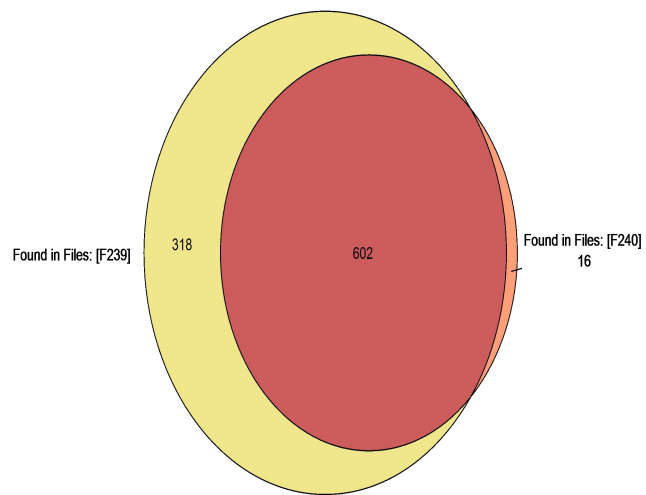

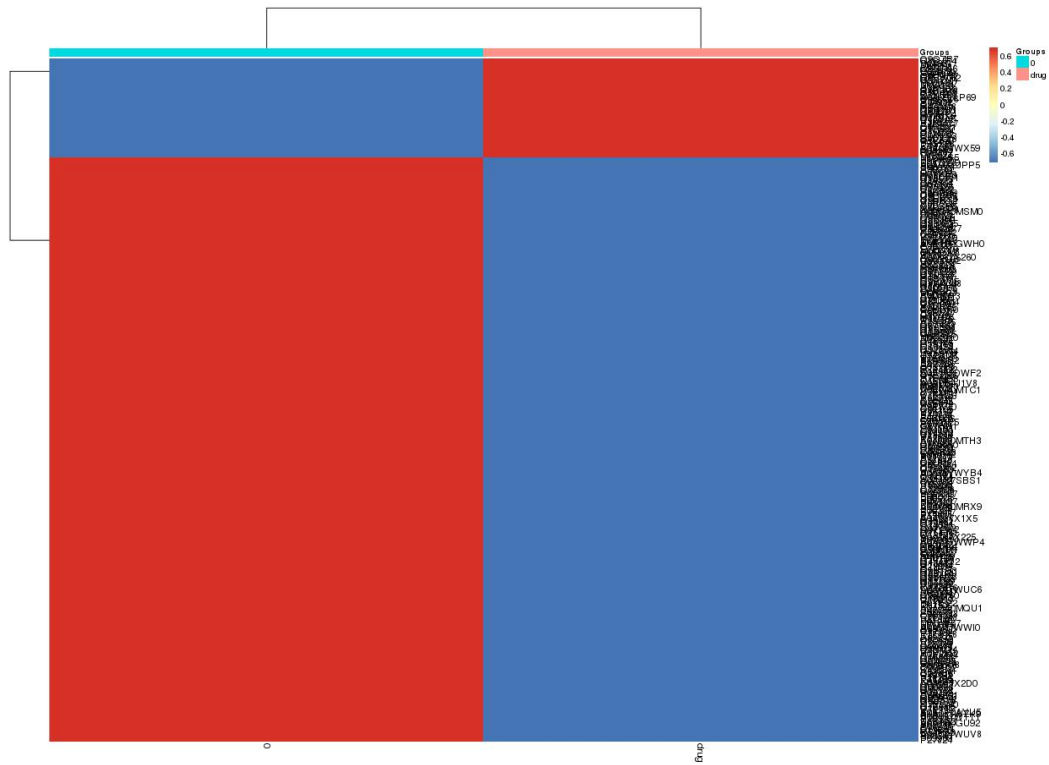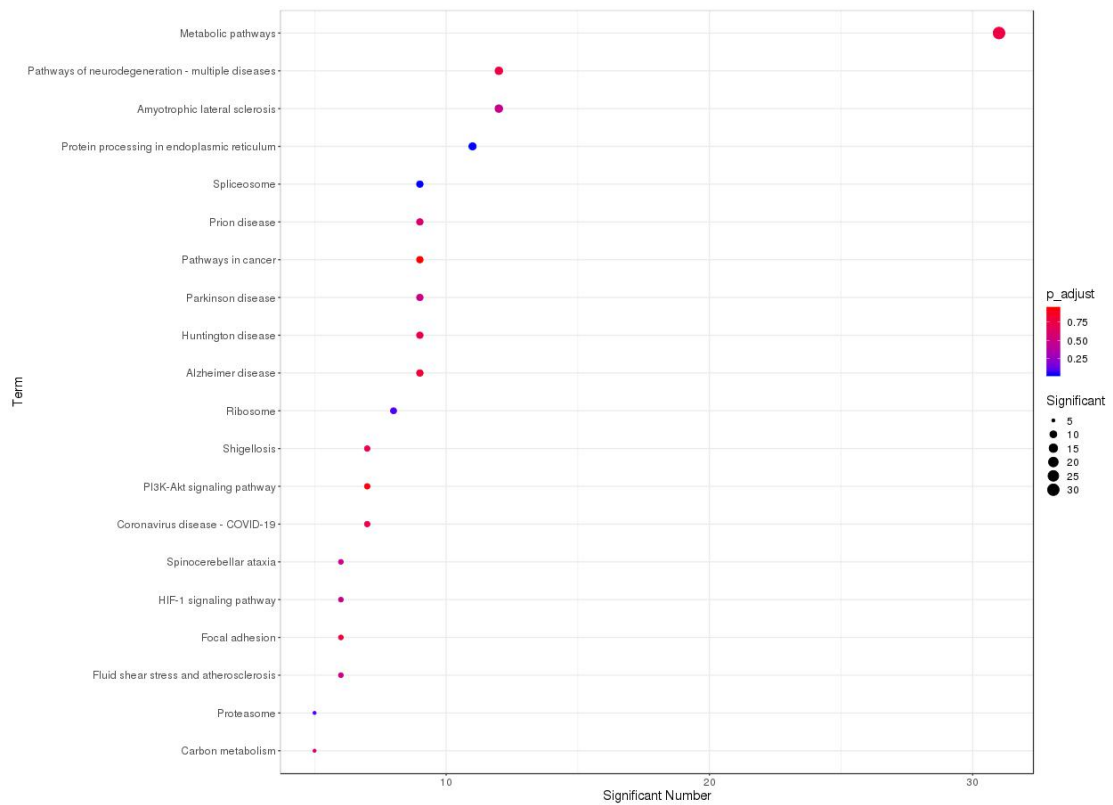

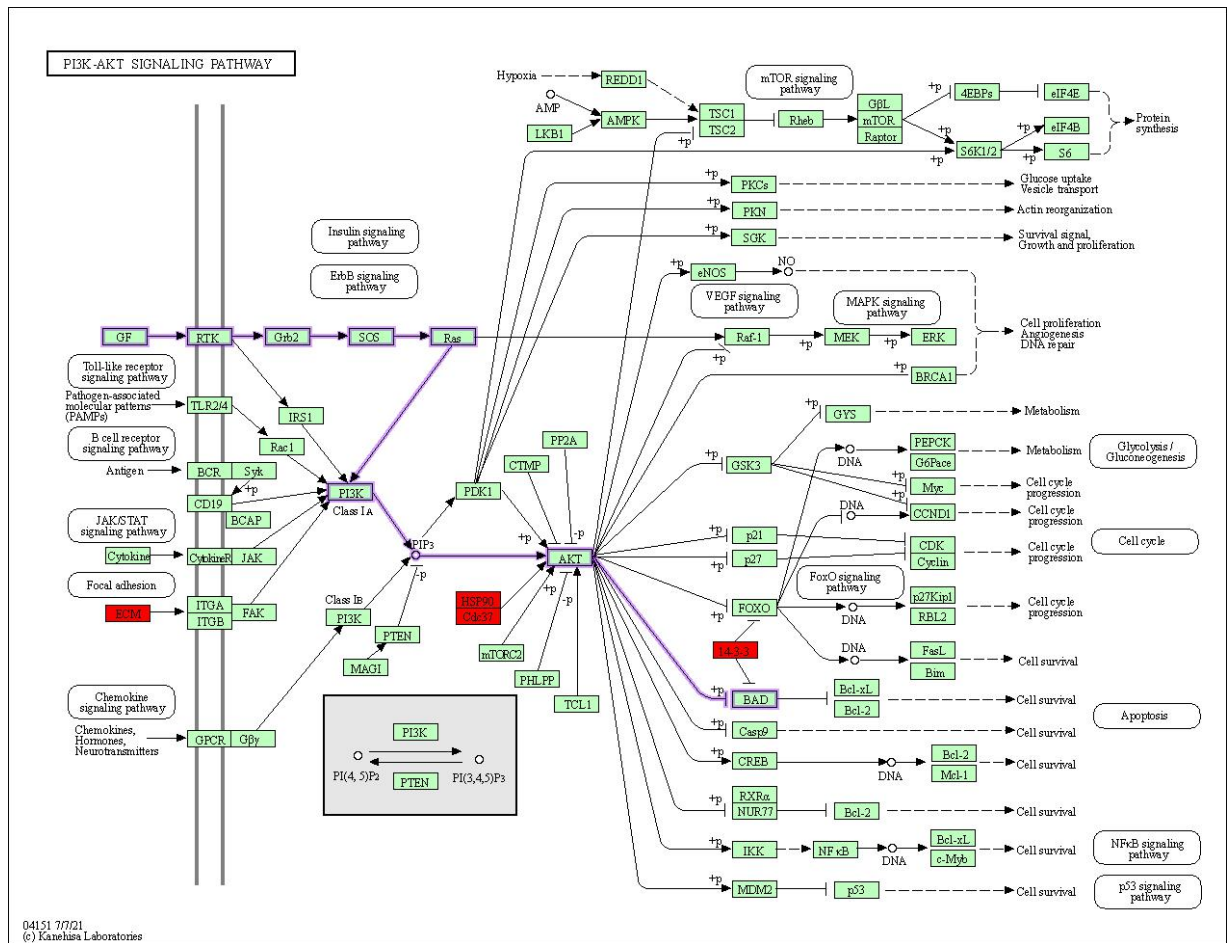

## qRT-PCR

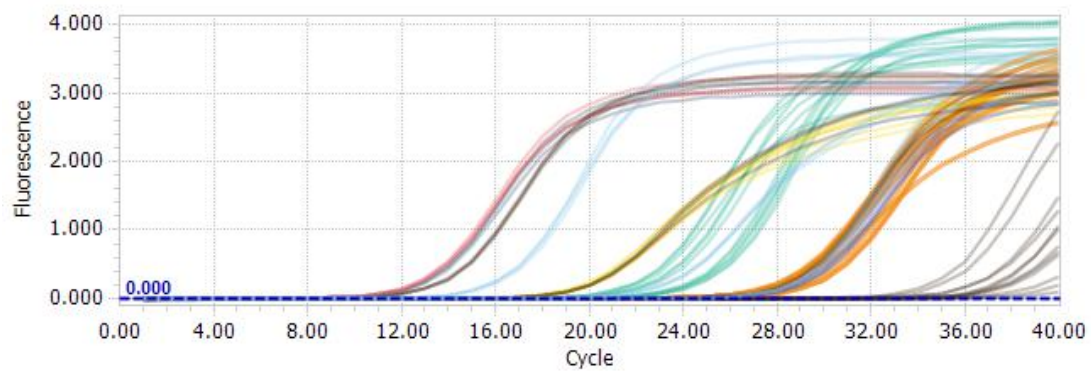

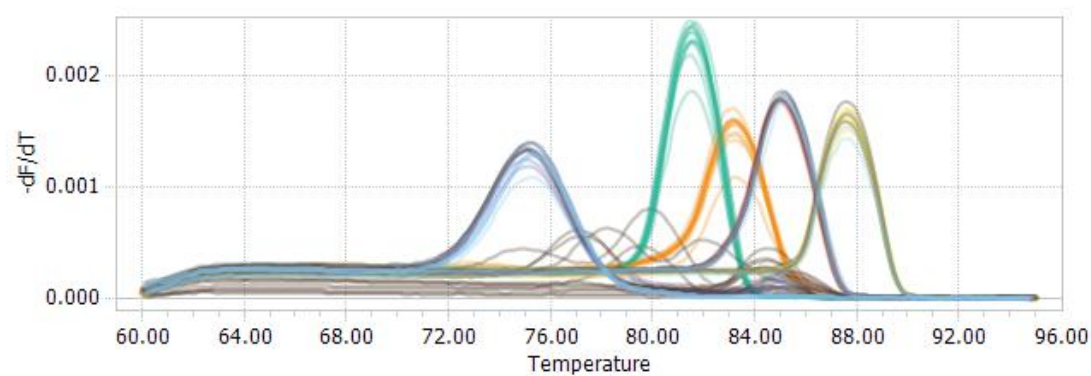

| Color       | Position | Gene Name | Cq    | Concentr | Call     | Excluded  | Sample Ty | Standard | Cq    | Mean | Cq | Error | Concentr | Concentr | Replicate  | Dye | Edited | Cs | Slope | EPF |
|-------------|----------|-----------|-------|----------|----------|-----------|-----------|----------|-------|------|----|-------|----------|----------|------------|-----|--------|----|-------|-----|
| 255,132,1A1 |          | GAPDH     | 15.8  | -        | Positive | Unchecked | Unknown   | -        | 15.83 | 0.07 | -  | -     | -        | A1       | SYBR Green |     | 0.89   |    |       |     |
| 255,132,1A2 |          | GAPDH     | 15.91 | -        | Positive | Unchecked | Unknown   | -        | 15.83 | 0.07 | -  | -     | -        | A1       | SYBR Green |     | 0.9    |    |       |     |
| 255,132,1A3 |          | GAPDH     | 15.79 | -        | Positive | Unchecked | Unknown   | -        | 15.83 | 0.07 | -  | -     | -        | A1       | SYBR Green |     | 1      |    |       |     |
| 255,132,1A4 |          | AKT       | 23.12 | -        | Positive | Unchecked | Unknown   | -        | 23.18 | 0.06 | -  | -     | -        | A4       | SYBR Green |     | 0.57   |    |       |     |
| 255,132,1A5 |          | AKT       | 23.2  | -        | Positive | Unchecked | Unknown   | -        | 23.18 | 0.06 | -  | -     | -        | A4       | SYBR Green |     | 0.6    |    |       |     |
| 255,132,1A6 |          | AKT       | 23.23 | -        | Positive | Unchecked | Unknown   | -        | 23.18 | 0.06 | -  | -     | -        | A4       | SYBR Green |     | 0.55   |    |       |     |
| 255,132,1A7 |          | BCL-2     | 28.59 | -        | Positive | Unchecked | Unknown   | -        | 28.59 | 0.03 | -  | -     | -        | A7       | SYBR Green |     | 0.92   |    |       |     |
| 255,132,1A8 |          | BCL-2     | 28.62 | -        | Positive | Unchecked | Unknown   | -        | 28.59 | 0.03 | -  | -     | -        | A7       | SYBR Green |     | 0.8    |    |       |     |
| 255,132,1A9 |          | BCL-2     | 28.56 | -        | Positive | Unchecked | Unknown   | -        | 28.59 | 0.03 | -  | -     | -        | A7       | SYBR Green |     | 0.98   |    |       |     |
| 255,66,41B1 |          | GAPDH     | 13.49 | -        | Positive | Unchecked | Unknown   | -        | 13.53 | 0.04 | -  | -     | -        | B1       | SYBR Green |     | 0.78   |    |       |     |
| 255,66,41B2 |          | GAPDH     | 13.56 | -        | Positive | Unchecked | Unknown   | -        | 13.53 | 0.04 | -  | -     | -        | B1       | SYBR Green |     | 0.75   |    |       |     |
| 255,66,41B3 |          | GAPDH     | 13.55 | -        | Positive | Unchecked | Unknown   | -        | 13.53 | 0.04 | -  | -     | -        | B1       | SYBR Green |     | 0.78   |    |       |     |
| 255,66,41B4 |          | AKT       | 20.04 | -        | Positive | Unchecked | Unknown   | -        | 20.04 | 0.01 | -  | -     | -        | B4       | SYBR Green |     | 0.5    |    |       |     |
| 255,66,41B5 |          | AKT       | 20.05 | -        | Positive | Unchecked | Unknown   | -        | 20.04 | 0.01 | -  | -     | -        | B4       | SYBR Green |     | 0.49   |    |       |     |
| 255,66,41B6 |          | AKT       | 20.04 | -        | Positive | Unchecked | Unknown   | -        | 20.04 | 0.01 | -  | -     | -        | B4       | SYBR Green |     | 0.42   |    |       |     |
| 255,66,41B7 |          | BCL-2     | 28.29 | -        | Positive | Unchecked | Unknown   | -        | 28.43 | 0.12 | -  | -     | -        | B7       | SYBR Green |     | 0.73   |    |       |     |
| 255,66,41B8 |          | BCL-2     | 28.53 | -        | Positive | Unchecked | Unknown   | -        | 28.43 | 0.12 | -  | -     | -        | B7       | SYBR Green |     | 0.79   |    |       |     |
| 255,66,41B9 |          | BCL-2     | 28.46 | -        | Positive | Unchecked | Unknown   | -        | 28.43 | 0.12 | -  | -     | -        | B7       | SYBR Green |     | 0.83   |    |       |     |
| 255,234,7C1 |          | GAPDH     | 12.59 | -        | Positive | Unchecked | Unknown   | -        | 12.56 | 0.07 | -  | -     | -        | C1       | SYBR Green |     | 0.71   |    |       |     |
| 255,234,7C2 |          | GAPDH     | 12.6  | -        | Positive | Unchecked | Unknown   | -        | 12.56 | 0.07 | -  | -     | -        | C1       | SYBR Green |     | 0.71   |    |       |     |
| 255,234,7C3 |          | GAPDH     | 12.48 | -        | Positive | Unchecked | Unknown   | -        | 12.56 | 0.07 | -  | -     | -        | C1       | SYBR Green |     | 0.77   |    |       |     |
| 255,250,2C4 |          | AKT       | 20.07 | -        | Positive | Unchecked | Unknown   | -        | 20.11 | 0.04 | -  | -     | -        | C4       | SYBR Green |     | 0.48   |    |       |     |
| 255,250,2C5 |          | AKT       | 20.11 | -        | Positive | Unchecked | Unknown   | -        | 20.11 | 0.04 | -  | -     | -        | C4       | SYBR Green |     | 0.46   |    |       |     |
| 255,250,2C6 |          | AKT       | 20.15 | -        | Positive | Unchecked | Unknown   | -        | 20.11 | 0.04 | -  | -     | -        | C4       | SYBR Green |     | 0.42   |    |       |     |
| 255,95,1C7  |          | BCL-2     | 28.95 | -        | Positive | Unchecked | Unknown   | -        | 28.88 | 0.1  | -  | -     | -        | C7       | SYBR Green |     | 0.66   |    |       |     |
| 255,95,1C8  |          | BCL-2     | 28.92 | -        | Positive | Unchecked | Unknown   | -        | 28.88 | 0.1  | -  | -     | -        | C7       | SYBR Green |     | 0.73   |    |       |     |
| 255,95,1C9  |          | BCL-2     | 28.77 | -        | Positive | Unchecked | Unknown   | -        | 28.88 | 0.1  | -  | -     | -        | C7       | SYBR Green |     | 0.74   |    |       |     |

## Western blotting

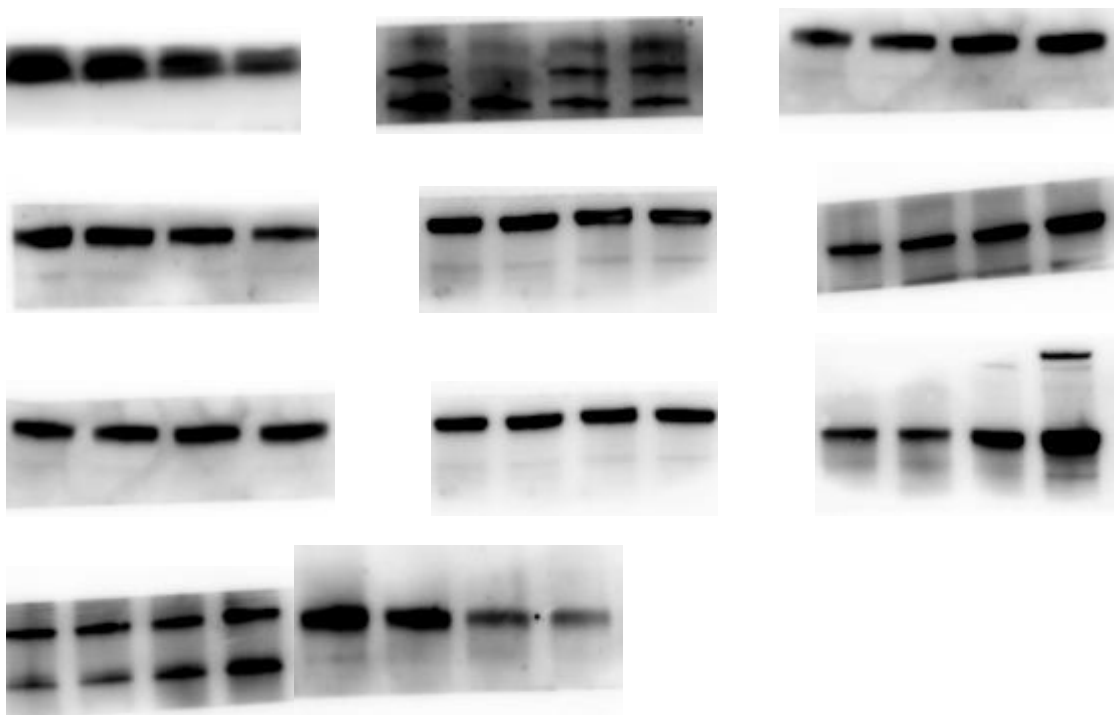

Supplement: Supplementary file 1 [file 1]
