# Supplementary material
Source: publisher figshare collection journal article supplement (https://karger.figshare.com/articles/dataset/_/22292473)

## Transwell chamber experiment

### Migration

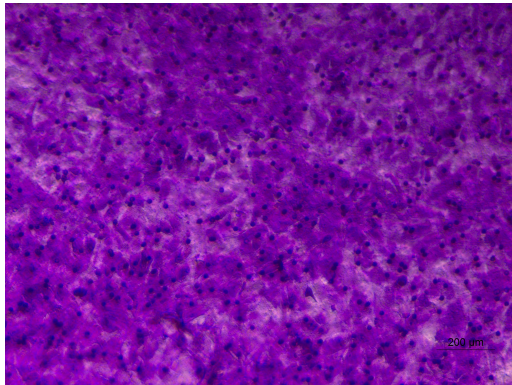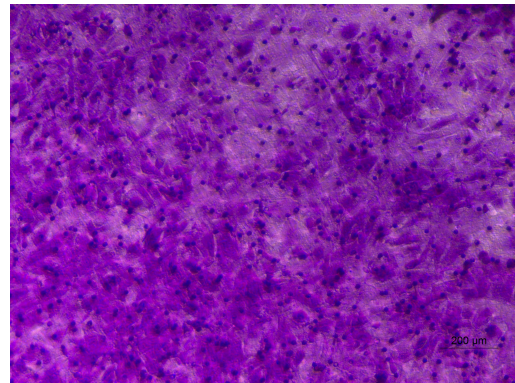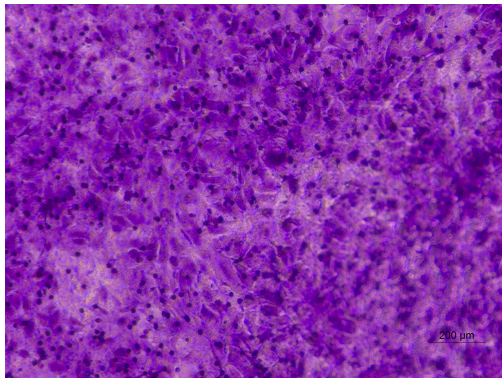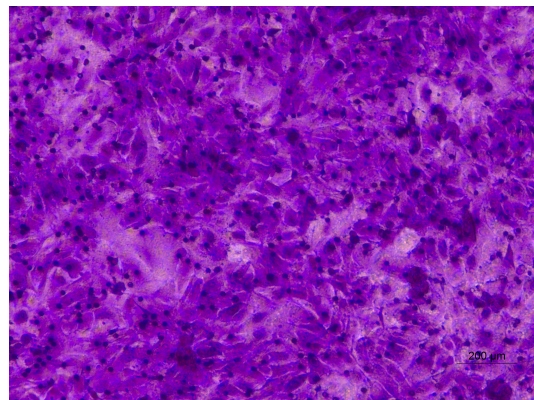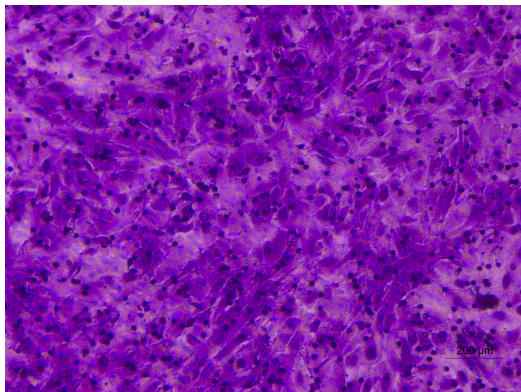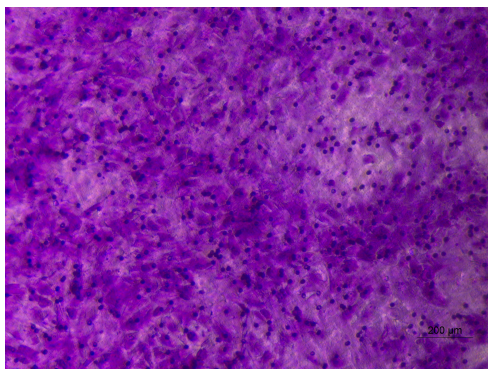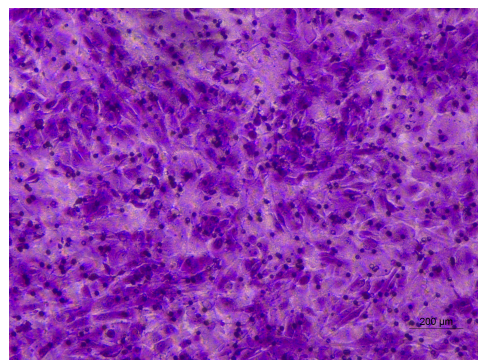

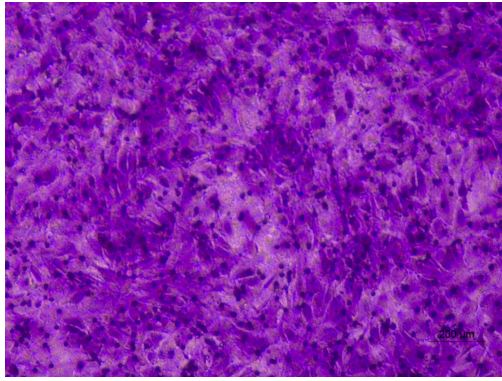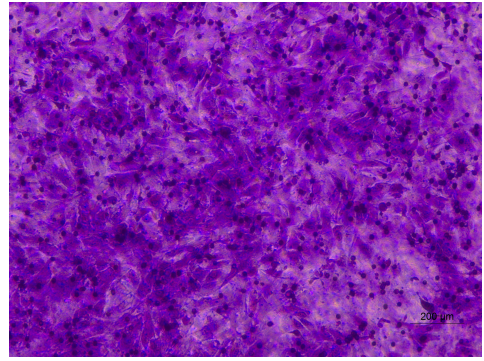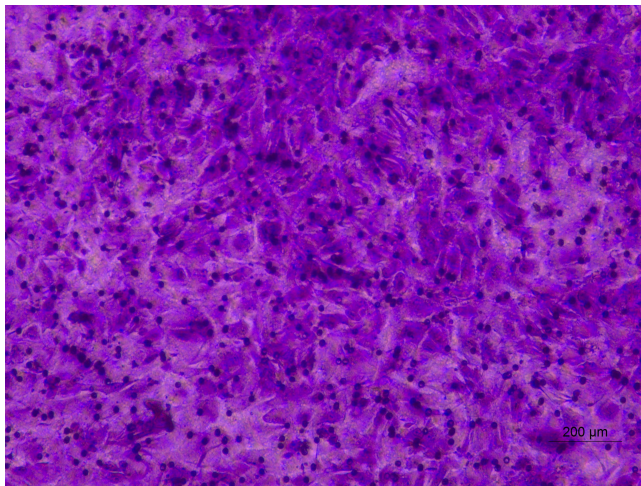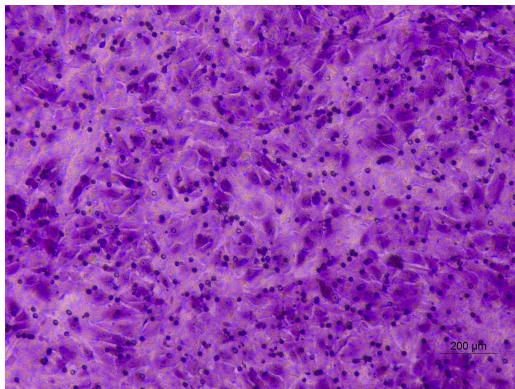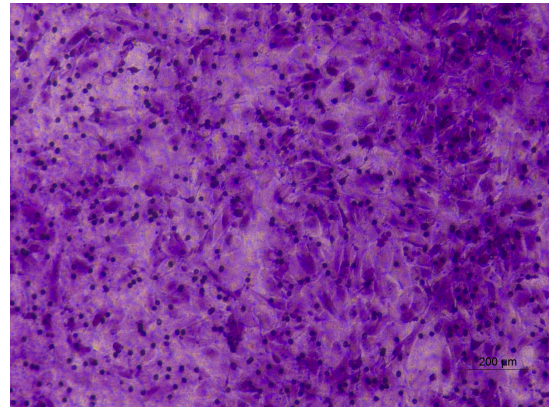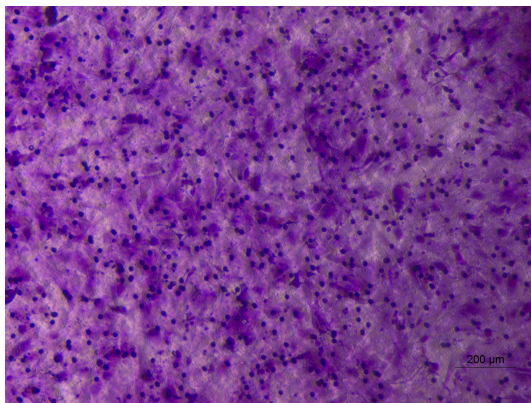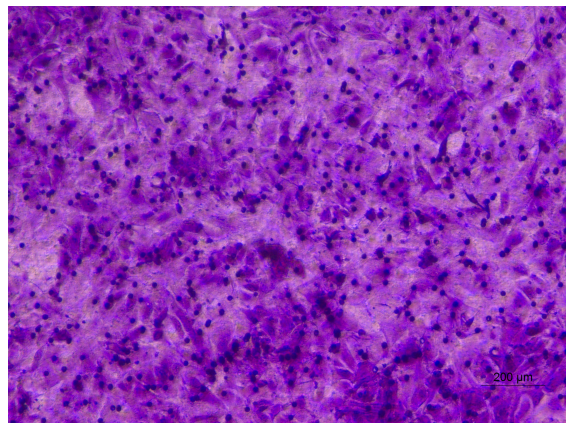

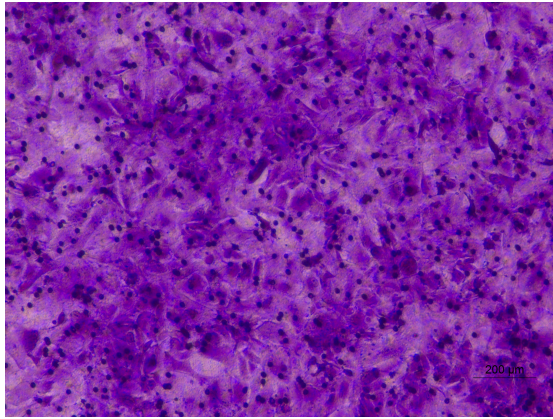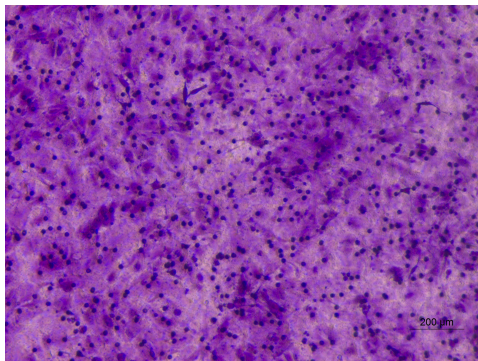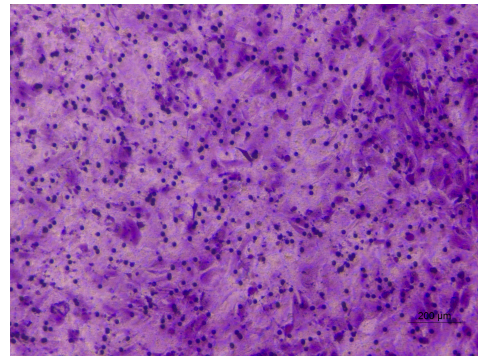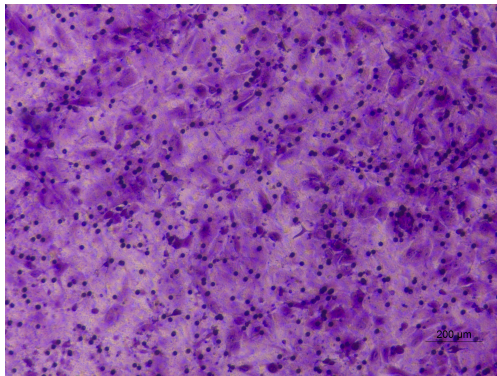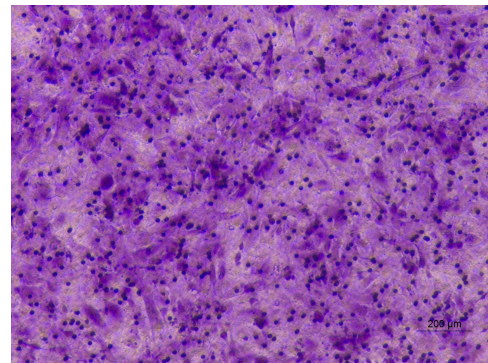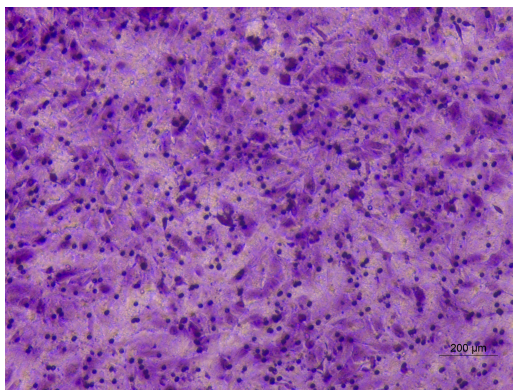

**Invasion**

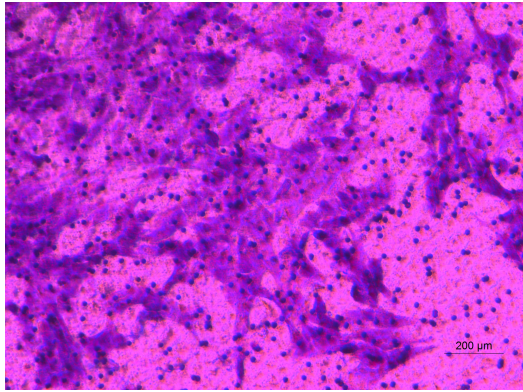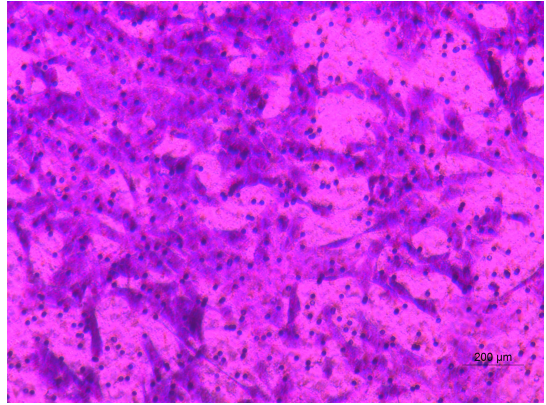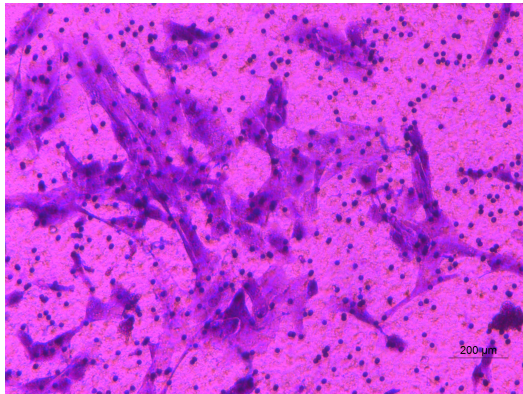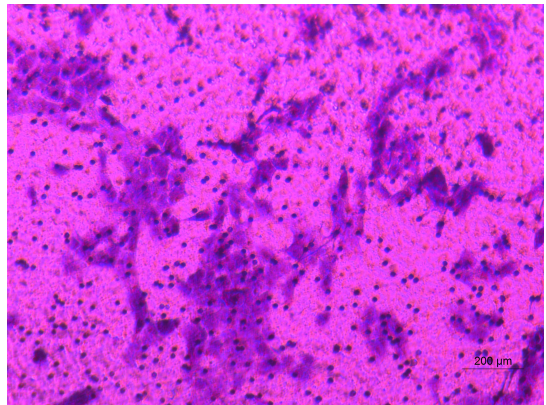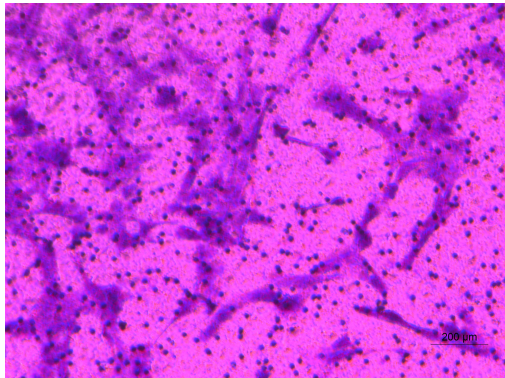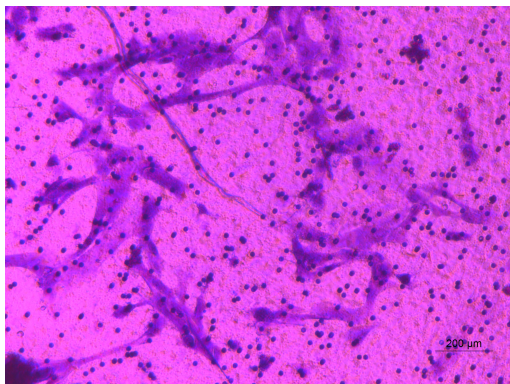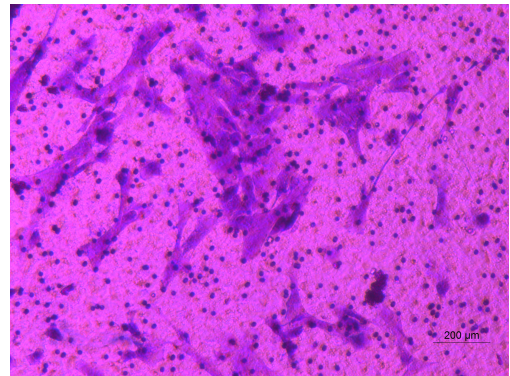

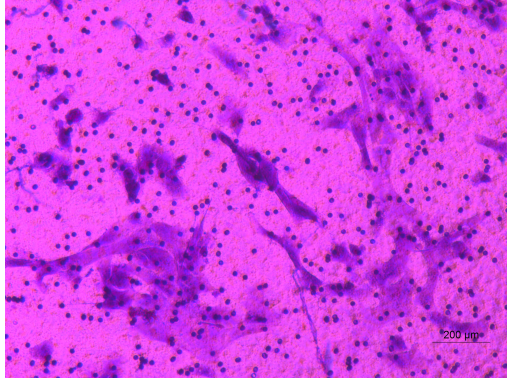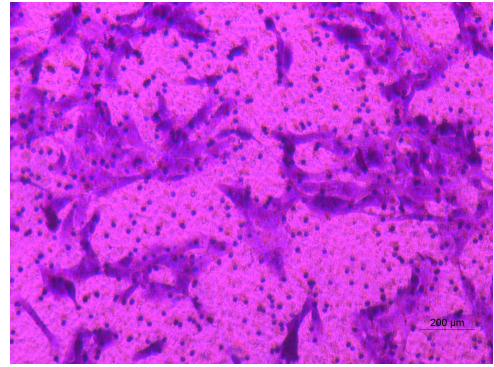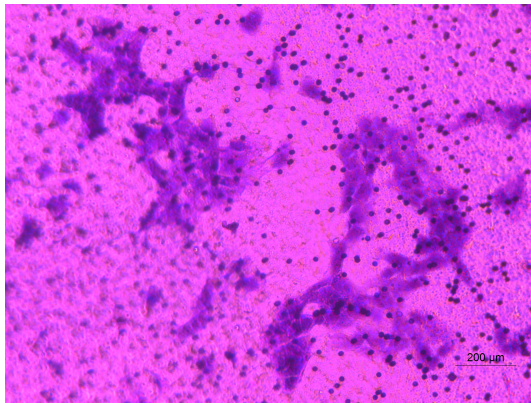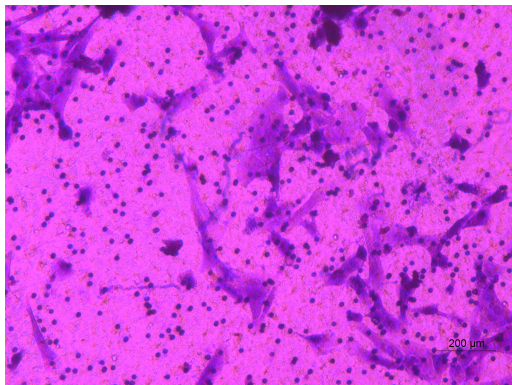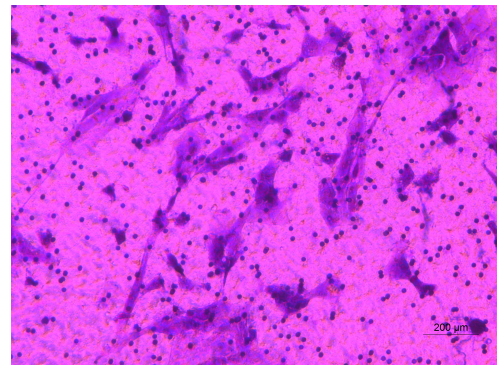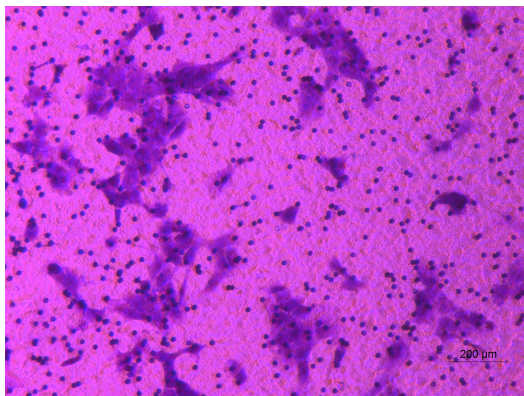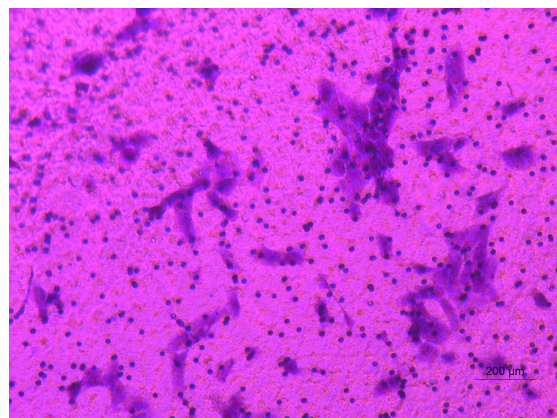

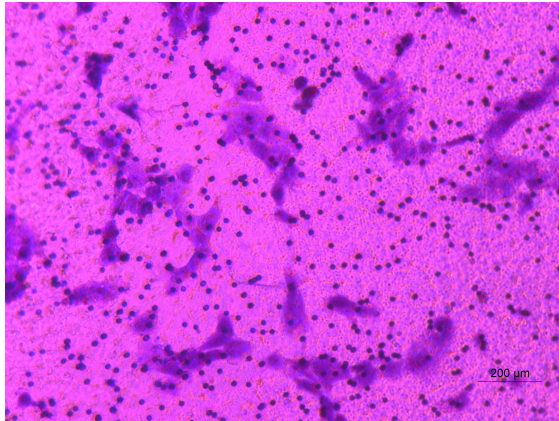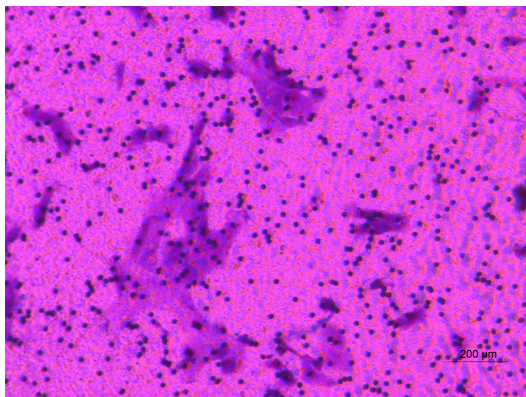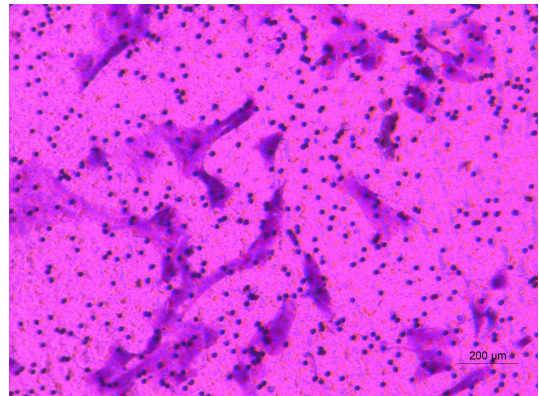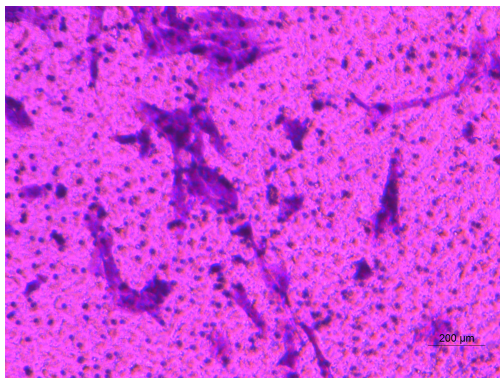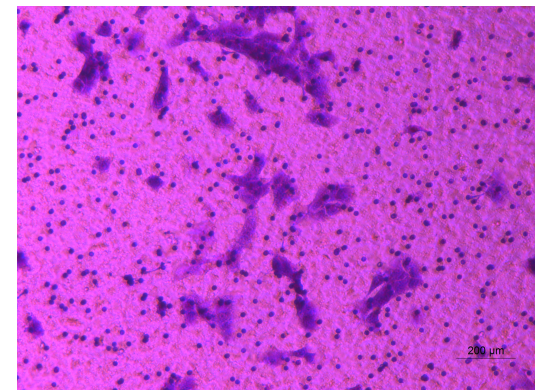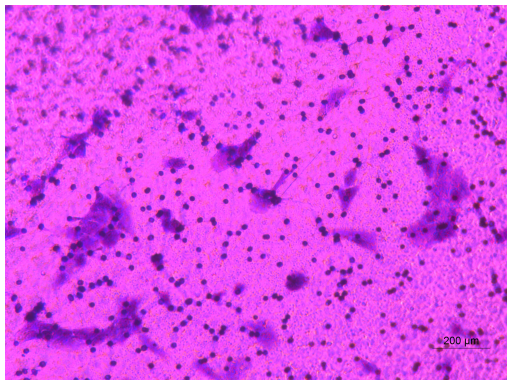

Supplement: Supplementary file 2 [file 1]
